# Supplementary material for: Population Pharmacokinetic Study of Benzylpenicillin in Critically Unwell Adults
Source: MDPI journal article supplement (doi:10.3390/antibiotics12040643), 2023-03-24
Supplement: s1 [file s1]

## Supplementary Material

Table S1: Summary of covariate model building

| Run No. | Compartments | Model                             | OFV          | Δ OFV        | Comments                                                                                    |
|---------|--------------|-----------------------------------|--------------|--------------|---------------------------------------------------------------------------------------------|
| 1       | 1            | Basic model                       | 296.4        | -            |                                                                                             |
| 2       | 2            | <b>Basic model</b>                | <b>192.0</b> | -            | <b>Accepted</b>                                                                             |
| 3       | 3            | Basic model                       | 189.4        | -            | V1 0.25 L/70 kg; Q1 27300 L/h/70 kg: suggesting insignificant compartment                   |
| 4       | 2            | <b>Model 2 + Creatinine on CL</b> | <b>172.9</b> | <b>-19.1</b> | <b>Accepted</b>                                                                             |
| 5       | 2            | Model 4 + BMI on V1               | 172.1        | -0.8         | Rejected                                                                                    |
| 6       | 2            | Model 4 + Height on V1            | 172.9        | 0            | Rejected                                                                                    |
| 7       | 2            | Model 4 + Height on CL            | 168.9        | -4.0         | Large increase in uncertainty, therefore rejected (RSE on height covariate effect is 5119%) |
| 8       | 2            | Model 4 + Height on V2            | 172.7        | -0.2         | Rejected                                                                                    |
| 9       | 2            | Model 4 + Albumin on V1           | 172.3        | -0.6         | Rejected                                                                                    |
| 10      | 2            | Model 4 + Albumin on Q            | 171.3        | -1.6         | Rejected                                                                                    |
| 11      | 2            | Model 4+ Albumin on V2            | 170.6        | -2.3         | Rejected                                                                                    |
| 12      | 2            | Model 4 + Temperature on V1       | 170.0        | -2.9         | Rejected                                                                                    |
| 13      | 2            | Model 4 + Temperature on V2       | 162.7        | -10.2        | Large increase in uncertainty on other parameters, therefore rejected                       |
| 14      | 2            | Model 4 + Temperature on Q        | 171.0        | -1.9         | Rejected                                                                                    |
| 15      | 2            | Model 4 + APACHE on V1            | 172.1        | -0.8         | Rejected                                                                                    |
| 16      | 2            | Model 4 + APACHE on V2            | 172.7        | -0.2         | Rejected                                                                                    |
| 17      | 2            | Model 4 + SEX on CL               | 172.6        | -0.3         | Rejected                                                                                    |
| 18      | 2            | Model 4 + SEX on CL               | 172.9        | 0            | Rejected                                                                                    |
| 19      | 2            | SEX on V1                         | 172.9        | 0            | Rejected                                                                                    |

Table S2: Median %ft > MIC for various MICs with different dosing regimens

| MIC (mg/L) | 1200<br>bolus<br>hourly | mg<br>4-<br>bolus<br>hourly | mg<br>4-<br>bolus<br>hourly | 1200 mg bolus<br>followed by<br>6000 mg<br>infusion/24<br>hours | 7200<br>mg<br>infusion/24<br>hours | 1200 mg<br>infusion<br>over 2-<br>hours,<br>4-<br>hourly |
|------------|-------------------------|-----------------------------|-----------------------------|-----------------------------------------------------------------|------------------------------------|----------------------------------------------------------|
| 0.125      | 1.00                    | 1.00                        | 1.00                        | 1.00                                                            | 1.00                               | 1.00                                                     |
| 0.25       | 1.00                    | 1.00                        | 1.00                        | 1.00                                                            | 1.00                               | 1.00                                                     |
| 0.5        | 0.99                    | 1.00                        | 1.00                        | 1.00                                                            | 1.00                               | 1.00                                                     |
| 1.0        | 0.74                    | 0.99                        | 1.00                        | 1.00                                                            | 0.99                               | 0.99                                                     |
| 2.0        | 0.49                    | 0.74                        | 1.00                        | 1.00                                                            | 0.98                               | 0.76                                                     |
| 4.0        | 0.30                    | 0.49                        | 0.20                        | 0.90                                                            | 0.54                               |                                                          |
| 8.0        | 0.17                    | 0.30                        | 0.04                        | 0.00                                                            | 0.02                               |                                                          |
| 16.0       | 0.07                    | 0.17                        | 0.01                        | 0.00                                                            | 0.00                               |                                                          |
| 32.0       | 0.02                    | 0.07                        | 0.00                        | 0.00                                                            | 0.00                               |                                                          |
